# Supplementary material for: Laser Interstitial Thermal Therapy in Grade 2/3 IDH1/2 Mutant Gliomas: A Preliminary Report and Literature Review
Source: MDPI journal article supplement (doi:10.3390/curroncol29040209), 2022-04-08
Supplement: s1 [file s1]

# Laser Interstitial Thermal Therapy in Grade 2/3 *IDH1/2* Mutant Gliomas: A Preliminary Report and Literature Review

Gabrielle W. Johnson <sup>1</sup>, Rowland H. Han <sup>1</sup>, Matthew D. Smyth <sup>2</sup>, Eric C. Leuthardt <sup>1,3</sup> and Albert H. Kim <sup>1,3,\*</sup>

**Table S1.** Univariate Time to Event and Regression Analysis.

| Variable              | Progression | No Progression | Univariate Time to Event Analysis <sup>a</sup> | Univariate Regression Analysis |
|-----------------------|-------------|----------------|------------------------------------------------|--------------------------------|
|                       | N = 5       | N = 17         | P-value                                        | P-value                        |
| Age                   |             |                |                                                |                                |
| < 40 years            | 2 (40.)     | 3 (17.6)       | Ref                                            | Ref                            |
| ≥ 40 years            | 3 (60.0)    | 14 (82.4)      | 0.189                                          | 0.308                          |
| WHO Grade             |             |                |                                                |                                |
| Grade II              | 4 (80.0)    | 9 (52.9)       | Ref                                            | Ref                            |
| Grade III             | 1 (20.0)    | 8 (47.1)       | 0.454                                          | 0.298                          |
| Pathology             |             |                |                                                |                                |
| DA                    | 2 (40.0)    | 8 (47.1)       | Ref                                            | Ref                            |
| ODG                   | 3 (60.0)    | 9 (52.9)       | 0.775                                          | 0.781                          |
| Treatment Indication  |             |                |                                                |                                |
| 1 <sup>st</sup> Line  | 1 (20.0)    | 7 (41.2)       | Ref                                            | Ref                            |
| Salvage               | 4 (80.0)    | 10 (58.8)      | 0.413                                          | 0.399                          |
| Prior EOR             | N = 4       | N = 10         |                                                |                                |
| GTR                   | 2 (50.0)    | 6 (60.0)       | Ref                                            | Ref                            |
| STR                   | 2 (50.0)    | 4 (40.0)       | 0.630                                          | 0.733                          |
| Extent of Ablation    |             |                |                                                |                                |
| < 90%                 | 1 (25.0)    | 5 (31.3)       | Ref                                            | Ref                            |
| ≥ 90%                 | 3 (75.0)    | 11 (68.8)      | 0.630                                          | 0.808                          |
| Post-LITT Adjuvant Tx |             |                | 0.167                                          |                                |
| Chemotherapy Only     | 2 (40.0)    | 3 (25.0)       | NC                                             | Ref                            |
| RT + Chemotherapy     | 0 (0)       | 8 (66.7)       | NC                                             | >0.999                         |
| RT Only               | 0 (0)       | 1 (8.3)        | NC                                             | 0.999                          |
| Other                 | 2 (40.0)    | 0 (0)          | Not Included                                   | Not Included                   |
| None                  | 1 (20.0)    | 0 (0)          | Not Included                                   | Not Included                   |

<sup>a</sup> Calculated using the Mantel-Cox log-rank test; Abbreviations: DA = diffuse astrocytoma, ODG = oligodendroglioma, EOR = extent of resection, GTR = gross total resection, STR = subtotal resection, Tx = treatment, RT = radiation therapy, NC = not calculated.
